# Supplementary material for: Development and validation of a dynamic survival prediction model for patients with acute-on-chronic liver failure
Source: PubMed Central journal article supplement (PMC8570961; doi:10.1016/j.jhepr.2021.100369), 2021-09-29
Supplement: mmc1.pdf [file mmc1.pdf]

# Development and validation of a dynamic survival prediction model for patients with acute-on-chronic liver failure

Ben F.J. Goudsmit, Andries E. Braat, Maarten E. Tushuizen, Minneke J. Coenraad,  
Serge Vogelaar, Ian P.J. Alwayn, Bart van Hoek, Hein Putter

## Table of contents

|                                   |    |
|-----------------------------------|----|
| Supplement 1.....                 | 2  |
| Supplement 2.....                 | 4  |
| Supplement 3.....                 | 12 |
| Supplement 4.....                 | 17 |
| Supplementary figure legends..... | 18 |
| Fig. S1.....                      | 20 |
| Fig. S2.....                      | 21 |
| Fig. S3.....                      | 23 |
| Fig. S4.....                      | 25 |
| Fig. S5.....                      | 26 |
| Fig. S6.....                      | 27 |
| Table S1.....                     | 28 |
| Table S2.....                     | 29 |
| Table S3.....                     | 31 |
| Table S4.....                     | 32 |

## Supplement 1: instructions for ACLF-JM upload data preparation.

The online ACLF-JM tool requires the user to upload patient data in an Excel file, .csv format. To make the predictions work, data needs to have the same properties as the example below. Please use the example below as template (i.e. column names and data variables). Specifically: time\_of\_measurement and meldna are allowed to vary, with new values in every row. All the other variables should be kept constant, i.e. fill in the first row and then copy the contents until the last row of data. Ideally, these variables should be extracted from the UNOS or SRTR database, or from your own hospital with the help of data managers.

| id | time_of_measurement | meldna | time_of_last_measurement | death | age | femalesex | cirrhosis_present | acLF_grade | sbp_present | life_support_dependent |
|----|---------------------|--------|--------------------------|-------|-----|-----------|-------------------|------------|-------------|------------------------|
| 1  | 0                   | 27     | 51                       | 0     | 50  | 0         | 0                 | ACLF-1     | 0           | 0                      |
| 1  | 5                   | 24     | 51                       | 0     | 50  | 0         | 0                 | ACLF-1     | 0           | 0                      |
| 1  | 6                   | 24     | 51                       | 0     | 50  | 0         | 0                 | ACLF-1     | 0           | 0                      |
| 1  | 11                  | 26     | 51                       | 0     | 50  | 0         | 0                 | ACLF-1     | 0           | 0                      |
| 1  | 13                  | 26     | 51                       | 0     | 50  | 0         | 0                 | ACLF-1     | 0           | 0                      |
| 1  | 14                  | 27     | 51                       | 0     | 50  | 0         | 0                 | ACLF-1     | 0           | 0                      |
| 1  | 21                  | 25     | 51                       | 0     | 50  | 0         | 0                 | ACLF-1     | 0           | 0                      |
| 1  | 24                  | 25     | 51                       | 0     | 50  | 0         | 0                 | ACLF-1     | 0           | 0                      |
| 1  | 31                  | 25     | 51                       | 0     | 50  | 0         | 0                 | ACLF-1     | 0           | 0                      |

### Instructions:

- In the ID column: enter a random ID number (e.g. 1).
- In the time\_of\_measurement column: set the day of measurement, e.g. if you followed a patient from day 0 (start measurements) to day 50 (current date). If your measurements are taken on a specific date, please visit the following link to calculate the date difference in days: <https://support.microsoft.com/en-us/office/calculate-the-difference-between-two-dates-8235e7c9-b430-44ca-9425-46100a162f38>
- In the meldna column: enter the repeated measured MELD-Na scores of your patient.
- In the time\_of\_last\_measurement column: enter the last time (in days) your patient was measured. Typically, it is the date difference between the current date and start of follow-up, e.g. 51 days.

- In the death column: enter 1 if your patient died at the time\_of\_last\_measurement, if not: enter 0.
- In the age column: enter the age of your patient in years.
- In the femalesex column: enter 1 if your patient is female, if not: enter 0.
- In the aclf\_grade column: enter the CLIF-C OF score, which can be calculated at: <https://www.efclif.com/scientific-activity/score-calculators/clif-c-aclf> The possible levels are: "No ACLF", "ACLF-1", "ACLF-2" or "ACLF-3".
- In the sbp\_present column: enter 1 if your patient has bacterial peritonitis, if not: enter 0.
- In the life\_support\_dependent column: enter 1 if your patient is on life support, if not: enter 0.

Save the file (as .csv).

Then upload in the online application and predict survival for you patient.

## Supplement 2: Step-by-step instruction manual

Upon opening the link, the following interface will show. Please press the “Browse” button to upload patient data (.csv file).

### Dynamic predictions using the Acute-on-Chronic Liver Failure Joint Model (ACLF-JM)

For instructions and to download an example data .csv file, visit the [Instructions](#).

**Load single patient data**

No file selected

**Separator**

Comma  
 Semicolon  
 Tab

**Decimal**

Dot  
 Comma

**Quote**

None  
 Double Quote  
 Single Quote

**Prediction interval (days):**

**Type of Plot**

Survival  
 Cumulative Incidence  
 Longitudinal

1: upload a .csv file. 2: select a prediction interval. 3: use slider. 4: view survival probabilities.

Data [Survival Probabilities](#) [Plot](#) [Help](#)

Welcome to the ACLF-JM prediction tool. To use the tool, upload patient data in .csv format. The patient data should consist of: the MELD-Na score, time of measurement (days), age (years), femalesex (1 if true, 0 if false), cirrhosis present (1 if true, 0 if false), CLIF-C OF score for ACLF, presence of spontaneous bacterial peritonitis (1 if true, 0 if false), life support dependency (1 if true, 0 if false) and be stored in a CSV file with columns:

- **meldna** : a numeric variable.
- **time\_of\_measurement** : a numeric variable.
- **age** : a numeric variable.
- **femalesex** : a numeric variable.
- **cirrhosis\_present** : a numeric variable.
- **aclf\_grade** : a factor (categorical) variable, with levels *No ACLF*, *ACLF-1*, *ACLF-2*, *ACLF-3*
- **sbp\_present** : a numeric variable.
- **life\_support\_dependent** : a numeric variable.

You can use as a template the table above (e.g., copy-paste it in Excel and save it as CSV). Note: this app is case sensitive

Open the local .csv file from your computer. Below, the supplied example data file is loaded.

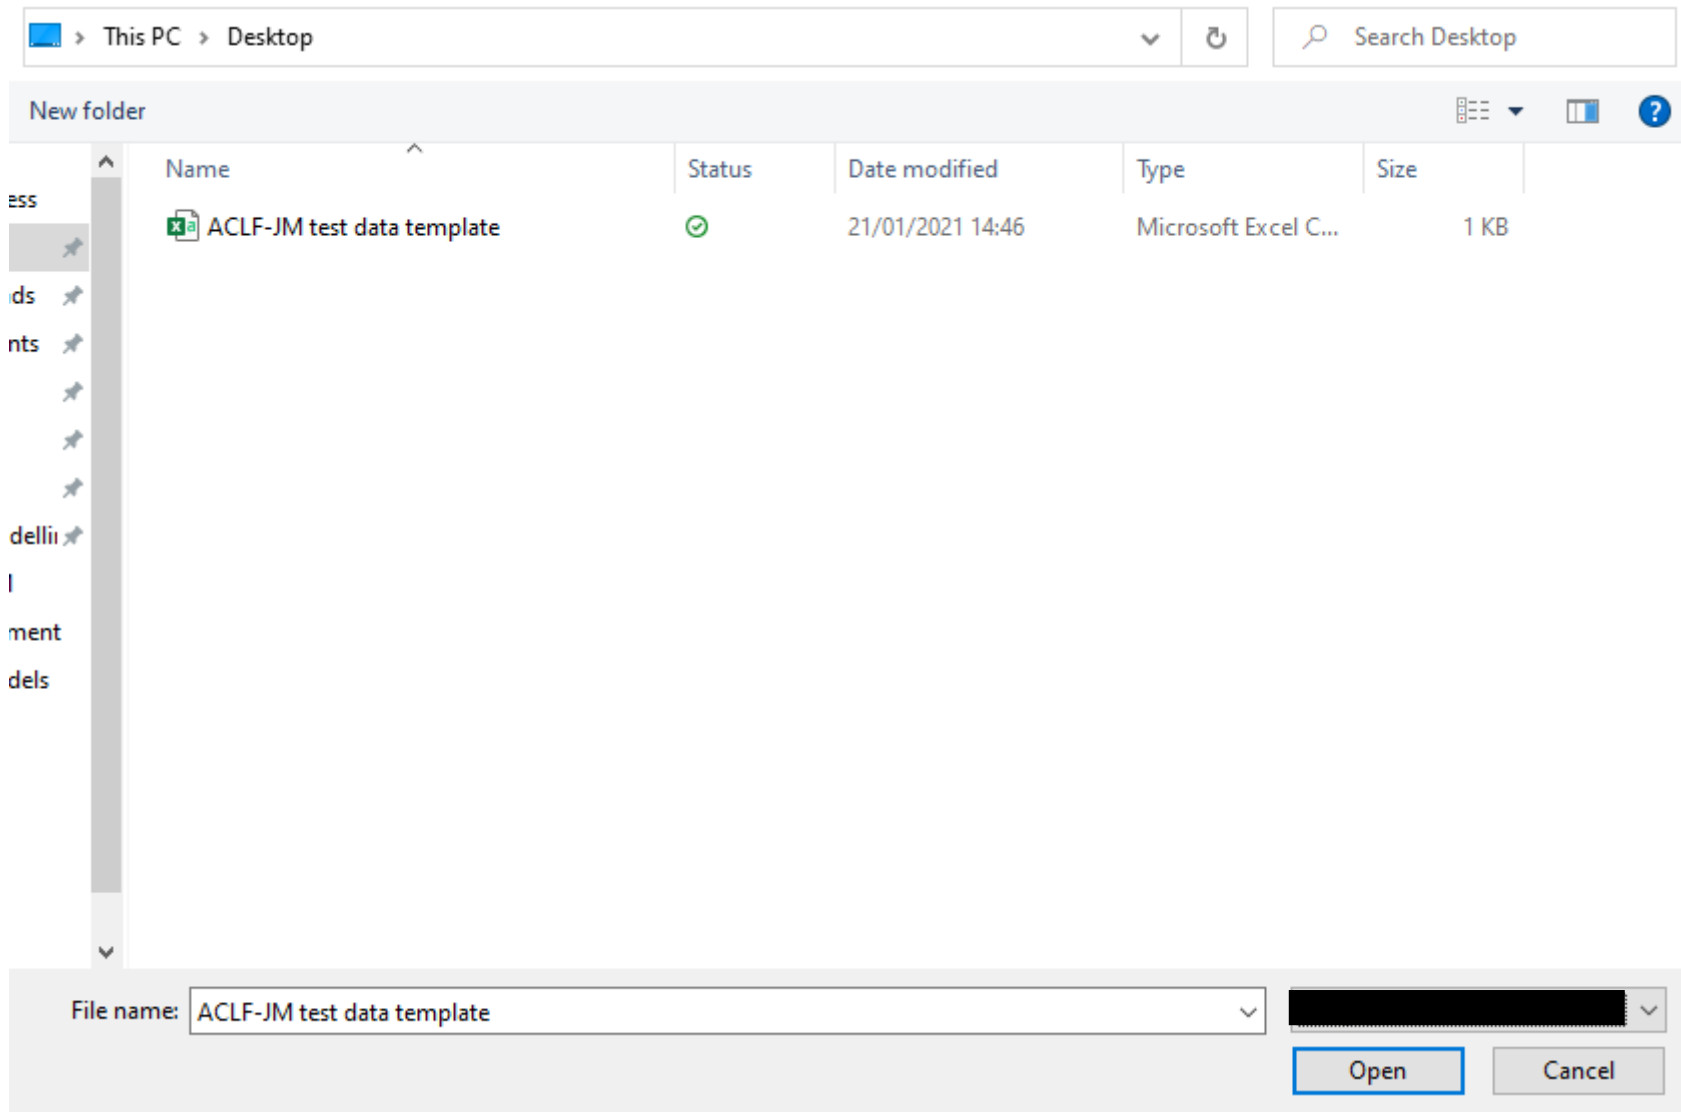

The loaded data is previewed in the “Data” tab. Now you can either select a specific prediction interval (e.g. 90 days) or leave it empty. The latter will give survival probabilities over multiple intervals.

Please click the “Survival Probabilities” tab and wait a few seconds for your predictions to load.

## Dynamic predictions using the Acute-on-Chronic Liver Failure Joint Model (ACLF-JM)

For instructions and to download an example data .csv file, visit the [Instructions](#).

**Load single patient data**

Browse... ACLF-JM test data template.csv

Upload complete

**Separator**

Comma     Dot     None

Semicolon     Comma     Double Quote

Tab     Single Quote

**Prediction interval (days):**

**Moment of measurement during follow-up:**

**Type of Plot**

Survival

Cumulative Incidence

Longitudinal

1: upload a .csv file. 2: select a prediction interval. 3: use slider. 4: view survival probabilities.

Data   **Survival Probabilities**   Plot   Help

| time_of_measurement | meldna | time_of_follow_up | death | age | femalesex | cirrhosis_present | aclf_grade | sbp_present |
|---------------------|--------|-------------------|-------|-----|-----------|-------------------|------------|-------------|
| 0                   | 27     | 51                | 0     | 50  | 0         | 0                 | ACLF-1     | 0           |
| 5                   | 24     | 51                | 0     | 50  | 0         | 0                 | ACLF-1     | 0           |
| 6                   | 24     | 51                | 0     | 50  | 0         | 0                 | ACLF-1     | 0           |
| 11                  | 26     | 51                | 0     | 50  | 0         | 0                 | ACLF-1     | 0           |
| 13                  | 26     | 51                | 0     | 50  | 0         | 0                 | ACLF-1     | 0           |
| 14                  | 27     | 51                | 0     | 50  | 0         | 0                 | ACLF-1     | 0           |
| 21                  | 25     | 51                | 0     | 50  | 0         | 0                 | ACLF-1     | 0           |
| 24                  | 25     | 51                | 0     | 50  | 0         | 0                 | ACLF-1     | 0           |
| 31                  | 25     | 51                | 0     | 50  | 0         | 0                 | ACLF-1     | 0           |
| 34                  | 28     | 51                | 0     | 50  | 0         | 0                 | ACLF-1     | 0           |
| 35                  | 29     | 51                | 0     | 50  | 0         | 0                 | ACLF-1     | 0           |
| 36                  | 30     | 51                | 0     | 50  | 0         | 0                 | ACLF-1     | 0           |
| 37                  | 32     | 51                | 0     | 50  | 0         | 0                 | ACLF-1     | 0           |
| 38                  | 33     | 51                | 0     | 50  | 0         | 0                 | ACLF-1     | 0           |
| 39                  | 32     | 51                | 0     | 50  | 0         | 0                 | ACLF-1     | 0           |
| 40                  | 33     | 51                | 0     | 50  | 0         | 0                 | ACLF-1     | 0           |
| 42                  | 34     | 51                | 0     | 50  | 0         | 0                 | ACLF-1     | 0           |
| 43                  | 35     | 51                | 0     | 50  | 0         | 0                 | ACLF-1     | 0           |
| 45                  | 40     | 51                | 0     | 50  | 0         | 0                 | ACLF-1     | 0           |
| 48                  | 40     | 51                | 0     | 50  | 0         | 0                 | ACLF-1     | 0           |
| 49                  | 40     | 51                | 0     | 50  | 0         | 0                 | ACLF-1     | 0           |
| 50                  | 40     | 51                | 0     | 50  | 0         | 0                 | ACLF-1     | 0           |

Below, the prediction interval is left empty. Also the slider titled “Moment of measurement during follow-up” is set to the left-most value. The slider summarizes the follow-up period of your patient. The left represents the start of follow-up (day 0) and the right represents the end of follow-up (e.g. day 51). As the slider is set on the left-most value, it shows the expected survival probabilities from day 0.

## Dynamic predictions using the Acute-on-Chronic Liver Failure Joint Model (ACLF-JM)

For instructions and to download an example data .csv file, visit the [Instructions](#).

**Load single patient data**

Browse... ACLF-JM test data template.csv

Upload complete

**Separator**

Comma  
 Semicolon  
 Tab

**Decimal**

Dot  
 Comma

**Quote**

None  
 Double Quote  
 Single Quote

**Prediction interval (days):**

**Moment of measurement during follow-up:**

1 22

**Type of Plot**

Survival  
 Cumulative Incidence  
 Longitudinal

1: upload a .csv file. 2: select a prediction interval. 3: use slider. 4: view survival probabilities.

| Time (days) | Survival probability (%) | 95% low | 95% upp |
|-------------|--------------------------|---------|---------|
| 0.00        | 100.00                   | 100.00  | 100.00  |
| 31.00       | 91.00                    | 70.00   | 99.00   |
| 70.00       | 71.00                    | 2.00    | 97.00   |
| 110.00      | 57.00                    | 0.00    | 96.00   |
| 149.00      | 45.00                    | 0.00    | 94.00   |
| 179.00      | 39.00                    | 0.00    | 92.00   |
| 218.00      | 32.00                    | 0.00    | 89.00   |
| 258.00      | 27.00                    | 0.00    | 88.00   |
| 297.00      | 23.00                    | 0.00    | 83.00   |
| 337.00      | 21.00                    | 0.00    | 76.00   |

Sliding the slider to the right will calculate predictions from the last moment of follow-up. In the example below, the patient is still alive at day 50 (100% survival). However, roughly 90 days later, the patient is expected to have been deceased.

## Dynamic predictions using the Acute-on-Chronic Liver Failure Joint Model (ACLF-JM)

For instructions and to download an example data .csv file, visit the [Instructions](#).

**Load single patient data**

Browse... ACLF-JM test data template.csv

Upload complete

**Separator**

Comma  Semicolon  Tab

**Decimal**

Dot  Comma

**Quote**

None  Double Quote  Single Quote

**Prediction interval (days):**

**Moment of measurement during follow-up:**

1 22

1 4 7 10 13 16 19 22

**Type of Plot**

Survival  Cumulative Incidence  Longitudinal

1: upload a .csv file. 2: select a prediction interval. 3: use slider. 4: view survival probabilities.

Data Survival Probabilities Plot Help

| Time (days) | Survival probability (%) | 95% low | 95% upp |
|-------------|--------------------------|---------|---------|
| 50.00       | 100.00                   | 100.00  | 100.00  |
| 70.00       | 59.00                    | 36.00   | 74.00   |
| 110.00      | 12.00                    | 0.00    | 33.00   |
| 139.00      | 4.00                     | 0.00    | 23.00   |
| 169.00      | 3.00                     | 0.00    | 19.00   |
| 209.00      | 2.00                     | 0.00    | 17.00   |
| 238.00      | 2.00                     | 0.00    | 16.00   |
| 268.00      | 2.00                     | 0.00    | 16.00   |
| 307.00      | 2.00                     | 0.00    | 16.00   |
| 337.00      | 2.00                     | 0.00    | 15.00   |





In the “Plot” tab, the survival probabilities and their 95% confidence interval (grey area) are plotted. Please change the slider or press the little “play” button to show the longitudinal disease development (\*) and expected survival probabilities.

## Dynamic predictions using the Acute-on-Chronic Liver Failure Joint Model (ACLF-JM)

For instructions and to download an example data .csv file, visit the [Instructions](#).

**Load single patient data**

Browse... ACLF-JM test data template.csv

Upload complete

**Separator**

Comma  Semicolon  Tab

**Decimal**

Dot  Comma

**Quote**

None  Double Quote  Single Quote

**Prediction interval (days):**

**Moment of measurement during follow-up:**

1  4  7  10  13  16  19  22

**Type of Plot**

Survival  Cumulative Incidence  Longitudinal

1: upload a .csv file. 2: select a prediction interval. 3: use slider. 4: view survival probabilities.

Data Survival Probabilities Plot Help

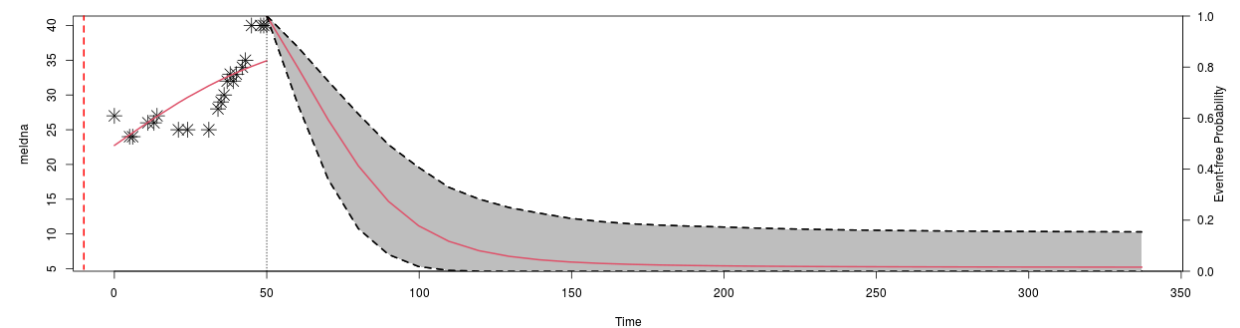

Specifying a prediction interval (e.g. 90 days), will give the calculated survival probabilities for that interval. Once again, you can change the slider to change the moment of follow-up. Below, the slider is set to the right (i.e. the last available measurement) and the predicted 90-day survival probability is 4% for this patient.

## Dynamic predictions using the Acute-on-Chronic Liver Failure Joint Model (ACLF-JM)

For instructions and to download an example data .csv file, visit the [Instructions](#).

**Load single patient data**

Browse... ACLF-JM test data template.csv

Upload complete

**Separator**

Comma  
 Semicolon  
 Tab

**Decimal**

Dot  
 Comma

**Quote**

None  
 Double Quote  
 Single Quote

**Prediction interval (days):**

90

**Moment of measurement during follow-up:**

1 4 7 10 13 16 19 22

**Type of Plot**

Survival  
 Cumulative Incidence  
 Longitudinal

1: upload a .csv file. 2: select a prediction interval. 3: use slider. 4: view survival probabilities.

| Time (days) | Survival probability (%) | 95% low | 95% upp |
|-------------|--------------------------|---------|---------|
| 50.00       | 100.00                   | 100.00  | 100.00  |
| 140.00      | 4.00                     | 0.00    | 23.00   |

The “Help” tab provides more details and instructions.

## Dynamic predictions using the Acute-on-Chronic Liver Failure Joint Model (ACLF-JM)

For instructions and to download an example data .csv file, visit the [Instructions](#).

**Load single patient data**

Browse... ACLF-JM test data template.csv

Upload complete

**Separator**

Comma

Semicolon

Tab

**Decimal**

Dot

Comma

**Quote**

None

Double Quote

Single Quote

**Prediction interval (days):**

90

**Moment of measurement during follow-up:**

1 4 7 10 13 15 19 22

**Type of Plot**

Survival

Cumulative Incidence

Longitudinal

1: upload a .csv file. 2: select a prediction interval. 3: use slider. 4: view survival probabilities.

Data Survival Probabilities Plot **Help**

### Dynamic Predictions explained

The dynamic predictions provided in this tool use longitudinal MELD-Na score data (i.e. waiting list follow-up data) on which survival can be predicted dynamically, i.e. updating on every new measurement. These predictions are generated with the ACLF-JM for longitudinal and time-to-event data in ACLF. More technical details can be found in the References.

### How this tool works

On the left hand side there are (or the will appear) a number of control arguments. In the main panel there are three tabs, named 'Data', 'Survival Probabilities' and 'Plots', in which the results appear.

#### Step I

Prepare the data according to the [Instructions](#).

- Load the comma separated file (.csv) containing the available patient data including both the longitudinally measured MELD-Na scores, baseline variables and outcomes for which predictions are to be calculated.
- The names of the variables/columns in this file and the coding of the categorical variables must be the same as shown in the 'Data' tab previous to uploading data.
- Depending on the locale of your machine it may be required to tweak the options 'Separator', 'Decimal' and 'Quote'.

#### Options & Widgets

- Upon starting the tool an example should appear in the main panel, under the 'Data' tab, that gives the names of the columns that should be used and the coding for categorical variables.
- After the user has loaded the data of the patient its data are depicted under the 'Data' tab. The calculation of the prediction is initiated after the user selects either the 'Event-free Probabilities' or 'Plot' tab. In addition, in the left hand side a slider appears, named 'Moment of measurement during follow-up', which selects the number of measurements used in the prediction. By pressing the small play button at the end of this slider the dynamic predictions are depicted in the 'Plot' tab.
- The 'Type of Plot' options on the left control the type of appearing in the 'Plot' tab. The default option 'Survival' depicts survival probabilities (aka event-free probabilities) for the event of interest based on the available longitudinal measurements. Similarly, option 'Cumulative Incidence' depicts cumulative incidence probabilities for the event of interest. Finally, option 'Longitudinal' can be selected to depict predictions for the future MELD-Na scores based on the recorded information.
- The field 'Prediction interval' specifies a horizon time point at which predictions are of interest. For example, for a 90-day survival probability set the value to 90.
- To calculate date differences for your .csv file, visit the [Excel date difference](#).

## Supplement 3: in-depth study methodology

### Statistical analysis – Joint Model construction

Data were randomly split in a training (67%) and a testing (33%) set, for model construction and validation respectively. A non-linear mixed-effect model was constructed, based on repeated measurements of MELD-Na. Mixed-effect models have several advantages: first, they can handle imbalanced data, i.e. a varying number of follow-up measurements per patient (missingness) and time differences between each measurement. Second, they consider in-patient correlation: measurements from one patient are more strongly correlated than measurements from different patients. Third, both the average and individual patient trajectories are modeled simultaneously. Fourth: non-linear developments can be modeled through flexible spline-based estimations of disease. The longitudinal MELD-Na data were corrected for candidate age, sex, life support dependency, presence of bacterial peritonitis, presence of cirrhosis (alcohol-induced, hepatitis-C virus, non-alcoholic steatohepatitis (NASH) or other cirrhosis) and CLIF-C OF score. The used variables were selected a priori, based on clinical relevance and statistical significance in univariate analysis. The mixed-effect JM output was added to the supplement (Table S1), as the natural spline coefficients do not offer an intuitive interpretation. We did however add a plot of the spline-based mixed effect of average MELD-Na development over time (Fig. S5). For the survival prediction part, a Cox proportional hazards model was used. We did not use competing risks analysis, but rather a censorship framework. The reason for this was that a competing risks model should not be used to develop prediction models for allocation priority. To illustrate, consider an environment in which livers are readily available for patients with MELD=40, but only rarely available for patients with MELD=20. A physician might predict, correctly, that a MELD=40

patient has lower risk of dying in the next week because they are almost certain to get a transplant, while the MELD=20 patient is still quite ill and will not receive a liver. However, it would be perverse to use this prediction to determine allocation priority. Changing allocation priority changes the association between MELD and risk of transplant, which changes the association between MELD and risk of mortality in a competing risks framework but not in a censorship framework. Instead, priority should be based on mortality risk \_if a transplant is not obtained\_, which is properly modeled using censorship. Then, the Cox model (survival component) was jointly-modeled to the mixed-effect model (longitudinal component) with the R JM package.<sup>23</sup> At every moment in time, the JM used both the MELD-Na score and the rate of change in MELD-Na (decrease/increase) for prediction.

#### Statistical analysis – Joint Model performance

Next, the prediction performance of the JM was compared to the MELD-Na score at various points in time in the separate testing data. To compare results to the CLIF-C OFs performance known from literature, predictions were assessed at baseline and after a follow-up of 48 hours, 7 days and 14 days.<sup>6</sup> Outcomes were 28-day and 90-day survival. A landmark Cox model of MELD-Na scores was fit at the abovementioned times, which used the last available measurement for survival prediction. For the JM, weighted averages of time-dependent AUCs and prediction errors were calculated through Monte Carlo Markov Chain (MCMC) simulations with the JM software.<sup>23</sup> An excellent explanation of time-dependent performance measures for joint models is at [http://www.drizopoulos.com/vignettes/dynamic\\_predictions](http://www.drizopoulos.com/vignettes/dynamic_predictions) and <https://cran.r-project.org/web/packages/JM/JM.pdf>. Here from we quote: “Two general approaches have been proposed in the literature to assess predictive performance of survival models, namely, calibration, i.e., how well the model predicts the observed data, and

discrimination, i.e., how well can the model discriminate between patients that had the event from patients that did not.

**Discrimination:** To take into account the dynamic nature of the longitudinal marker in discriminating between subjects, we focus on a time interval of medical relevance within which the occurrence of events is of interest. In this setting, a useful property of the model would be to successfully discriminate between patients who are going to experience the event within this time frame from patients who will not. To put this formally, as before, we assume that we have collected longitudinal measurements  $Y_j(t)$  up to time point  $t$  for subject  $j$ . We are interested in events occurring in the medically-relevant time frame  $(t, t + \Delta t]$  within which the physician can take an action to improve the survival chance of the patient. Under the assumed model and the methodology presented in the previous section, we can define a prediction rule using  $\pi_j(t + \Delta t | t)$  that takes into account the available longitudinal measurements  $Y_j(t)$ . In particular, for any value  $c$  in  $[0,1]$  we can term subject  $j$  as a case if  $\pi_j(t + \Delta t | t) \leq c$  (i.e., occurrence of the event) and analogously as a control if  $\pi_j(t + \Delta t | t) > c$ . For a randomly chosen pair of subjects  $\{j, j'\}$ , in which both subjects have provided measurements up to time  $t$ , the discriminating capability of the assumed model can be assessed by the area under the receiver operating characteristic curve (AUC), which is obtained for varying  $c$  and equals:

$$AUC(t, \Delta t) = \Pr [\pi_j(t + \Delta t | t) < \pi_{j'}(t + \Delta t | t) | \{T * j \in (t, t + \Delta t]\} \cap \{T * j' > t + \Delta t\}]$$

that is, if subject  $j$  experiences the event within the relevant time frame whereas subject  $j'$  does not, then we would expect the assumed model to assign higher probability of surviving longer than  $t + \Delta t$  for the subject who did not experience the event.

The dynamic discrimination index is computed through:

$$C_{dyn}^{\Delta t} = \int_0^{tmax} AUC(t, \Delta t) Pr\{E(t, \Delta t)\} dt / \int_0^{tmax} Pr\{E(t, \Delta t)\} dt ,$$

where  $AUC(t, \Delta t)$  is defined above, and

$$E(t, \Delta t) = \{T * i \in (t, t + \Delta t)\} \cap \{T * j > t + \Delta t\} ,$$

with  $i$  and  $j$  denote a randomly selected pair subjects, and  $\pi_i(t + \Delta t | t)$  and  $\pi_j(t + \Delta t | t)$  denote the conditional survival probabilities calculated for these two subjects, for different time windows  $\Delta t$ . The upper limit of integral is specified. The integrals in the numerator and denominator are approximated using a 15-point Gauss-Kronrod quadrature rule.

**Calibration:** The assessment of the accuracy of predictions of survival models is typically based on the expected error of predicting future events. In our setting, and again taking into account the dynamic nature of the longitudinal outcome, it is of interest to predict the occurrence of events at  $u > t$  given the information we have recorded up to time  $t$ . This gives rise to expected prediction error:

$$PE(u | t) = E[L\{Ni(u) - \pi_i(u | t)\}],$$

where  $Ni(t) = I(T * i > t)$  is the event status at time  $t$ ,  $L(\cdot)$  denotes a loss function, such as the absolute or square loss, and the expectation is taken with respect to the distribution of the event times."

Ensuring adequate performance during follow-up is important for possible clinical application. To provide intuitive interpretation of JM AUC and error reduction compared to MELD-Na, the percentage improvement in AUC towards the maximum achievable AUC of 1

was calculated similar to Jalan et al.:  $\frac{(AUC_{JM} - AUC_{MELD-Na})}{(1 - AUC_{MELD-Na})} * 100$ .<sup>6</sup> However, they presented

this AUC improvement as "prediction error improvement", which technically is not correct.

We therefore separately assessed the JM prediction error reduction compared to MELD-Na,

with the following calculation:  $\frac{(Error_{MELD-Na} - Error_{JM})}{(Error_{MELD-Na})} * 100$ .

#### Statistical analysis – Joint Model dynamic prediction

Finally, individual dynamic predictions were generated. Data from a real ACLF patient (obtained from the testing data) was MCMC simulated and used as input for the trained JM.<sup>23</sup>

Plots were created of these dynamic predictions, to show the updating survival estimate for every new available measurement during follow-up. All statistical analyses were performed using R v4.0.0 (R Foundation for Statistical Computing, Vienna, Austria).



## Supplement 4: explanation risk calculation figure 1

Consider three patients A, B and C who have been waiting 20 days for LT. A, B and C are identical, except for their MELD-Na scores. Patient A was stable at MELD-Na score 30, i.e. a slope of 0. Patient B started with MELD-Na 20 (baseline) and steadily increased to MELD-Na 25 (day 20), which is a slope of  $\frac{5}{20/365} = 91.3$  points per year. Patient C started with MELD-Na 10 at baseline and showed a rapid increase in MELD-Na scores. This results in MELD-Na score 20 at day 20 and a slope of 0.5 MELD-Na per day, which is 182 points per year. The current liver allocation system would give priority to patient A with MELD-Na score 30. However, the JM accounts for past measurements and further discriminates based on slope, i.e. considers that B and C have increasing disease severity and A is stable. Thus, the HR of death for each patient at day 20 can be calculated by multiplying the MELD-Na HR for value and slope (table 2). For patient A:  $1.15^{30} * 1.02^0 = 66.2$ , patient B:  $1.15^{25} * 1.02^{91.3} = 200.7$  and patient C:  $1.15^{20} * 1.02^{182} = 601.4$ . So at day 20, the JM would give patient B a  $\frac{200.7}{66.2} = 3$  times higher HR compared to patient A and patient C a  $\frac{601.4}{66.2} = 9$  times higher risk, indicating that patient C should be prioritized for transplantation.

## Fig. Slegends

1. Cumulative incidence plots of waiting list competing risks outcomes. Death rates are lowest in patients without ACLF and most are either removed or transplanted. With increasing ACLF grade, death and transplantation rates increase.
2. Baseline ROC and calibration plots are shown. The ACLF-JM has a significantly ( $p < 0.001$ ) higher 90-day mortality AUC in ACLF patients than MELD-Na, 0.875 (95%CI 0.840-0.909) and 0.780 (0.737-82.3) respectively. The ACLF-JM is also better calibrated than the MELD-Na. This is shown in figure 2-B. The closer the model stays to the diagonal, the better the predicted and observed risks match, i.e. more accurate predictions.
  - a. The ROC plot for 90-day mortality prediction in patients with ACLF.
  - b. The calibration plot for 90-day mortality prediction in patients with ACLF.
3.
  - a. The improvement in AUCs of the ACLF-JM compared to MELD-Na. With increasing ACLF severity, the ACLF-JM AUC improvement increases.
  - b. The prediction error improvement of the ACLF-JM compared to MELD-Na. With increasing ACLF disease severity, ACLF-JM prediction error improvement increases.
4. An illustration of the difference between the continuous and flexible ACLF-JM approximated course of development over time (yellow dotted line), versus that of a time-dependent Cox model (red solid lines). The ACLF-JM assumes a continuous, flexible disease development over time. This means that even if values are missing or old, adequate estimates of current disease severity are given. In contrast, for time-

dependent Cox models, the last measurement is linearly carried on forward. With infrequent measurement or missing values, this last observation does not represent the current state of disease. Also, with fast-changing disease severity, Cox models underestimate disease severity because they do not estimate the 'true' underlying developments. The blue arrows point at the moments where the Cox model would underestimate disease severity. Clinically, this could result in underestimation of mortality when evaluation the need for LT in a fast-declining ACLF patient.

5. Spline-based intuitive output, rationale for non-linear model.
6. ROC plot of 90-day survival prediction in patients delisted in the first 28 days of follow-up.

Fig. S1: cumulative incidence plots per ACLF grade

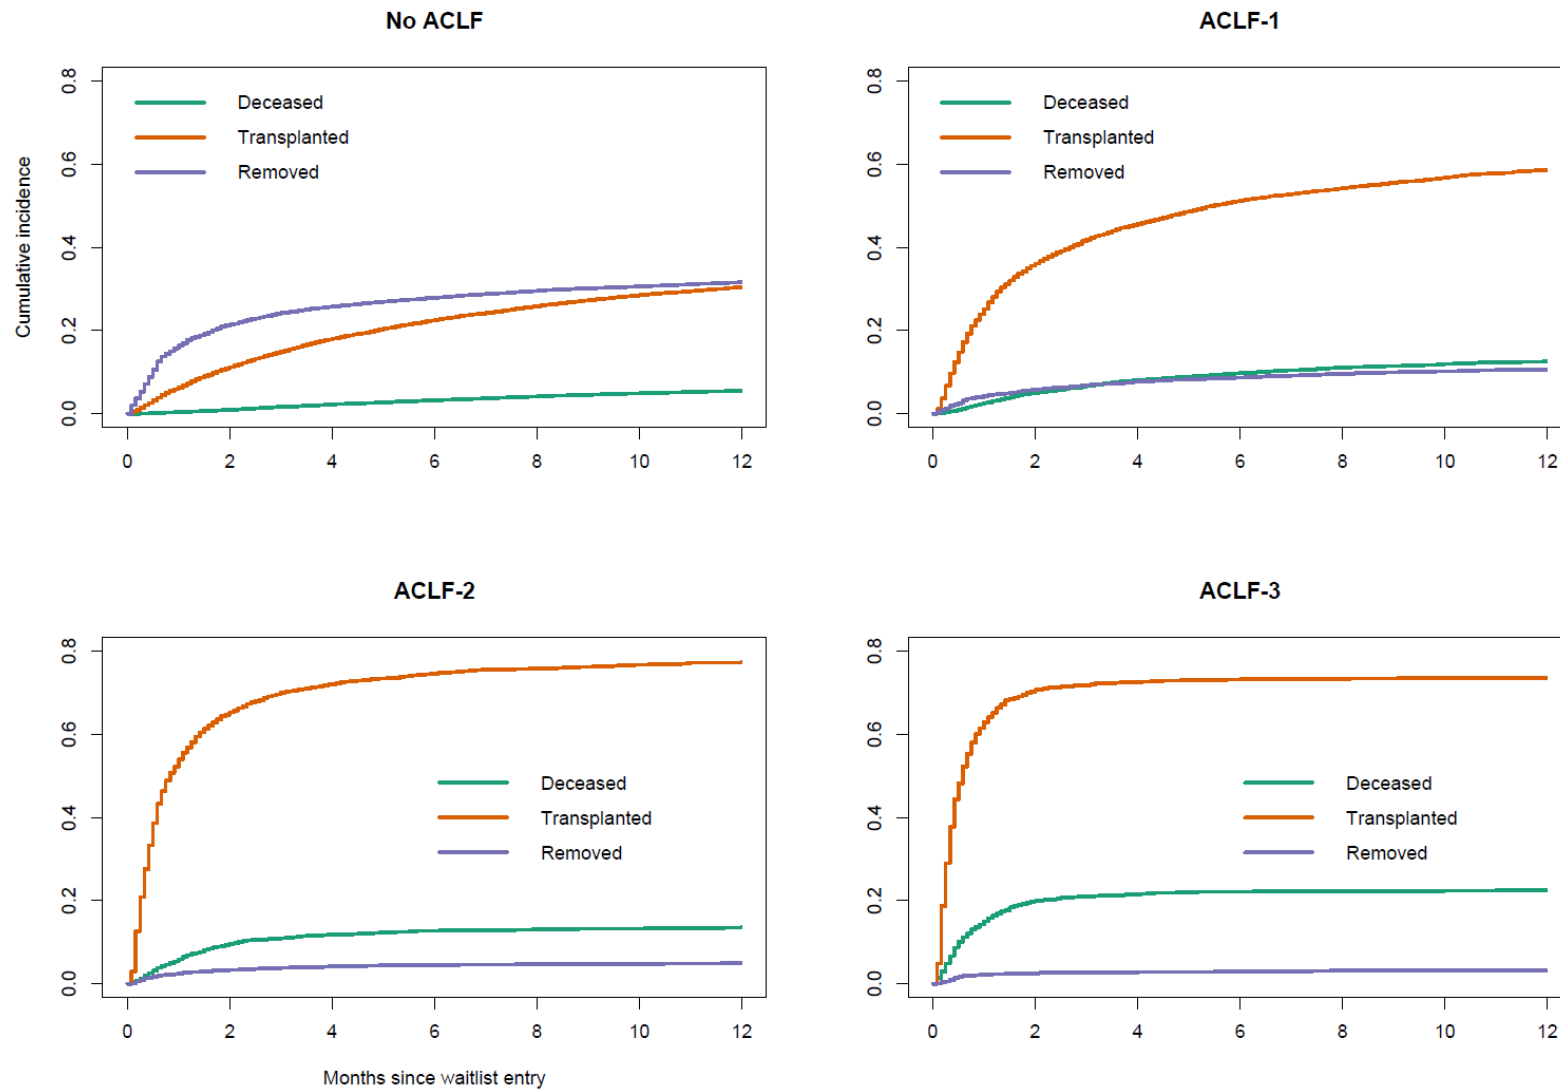

Fig. S2A: ROC plot of the ACLF-JM and MELD-Na

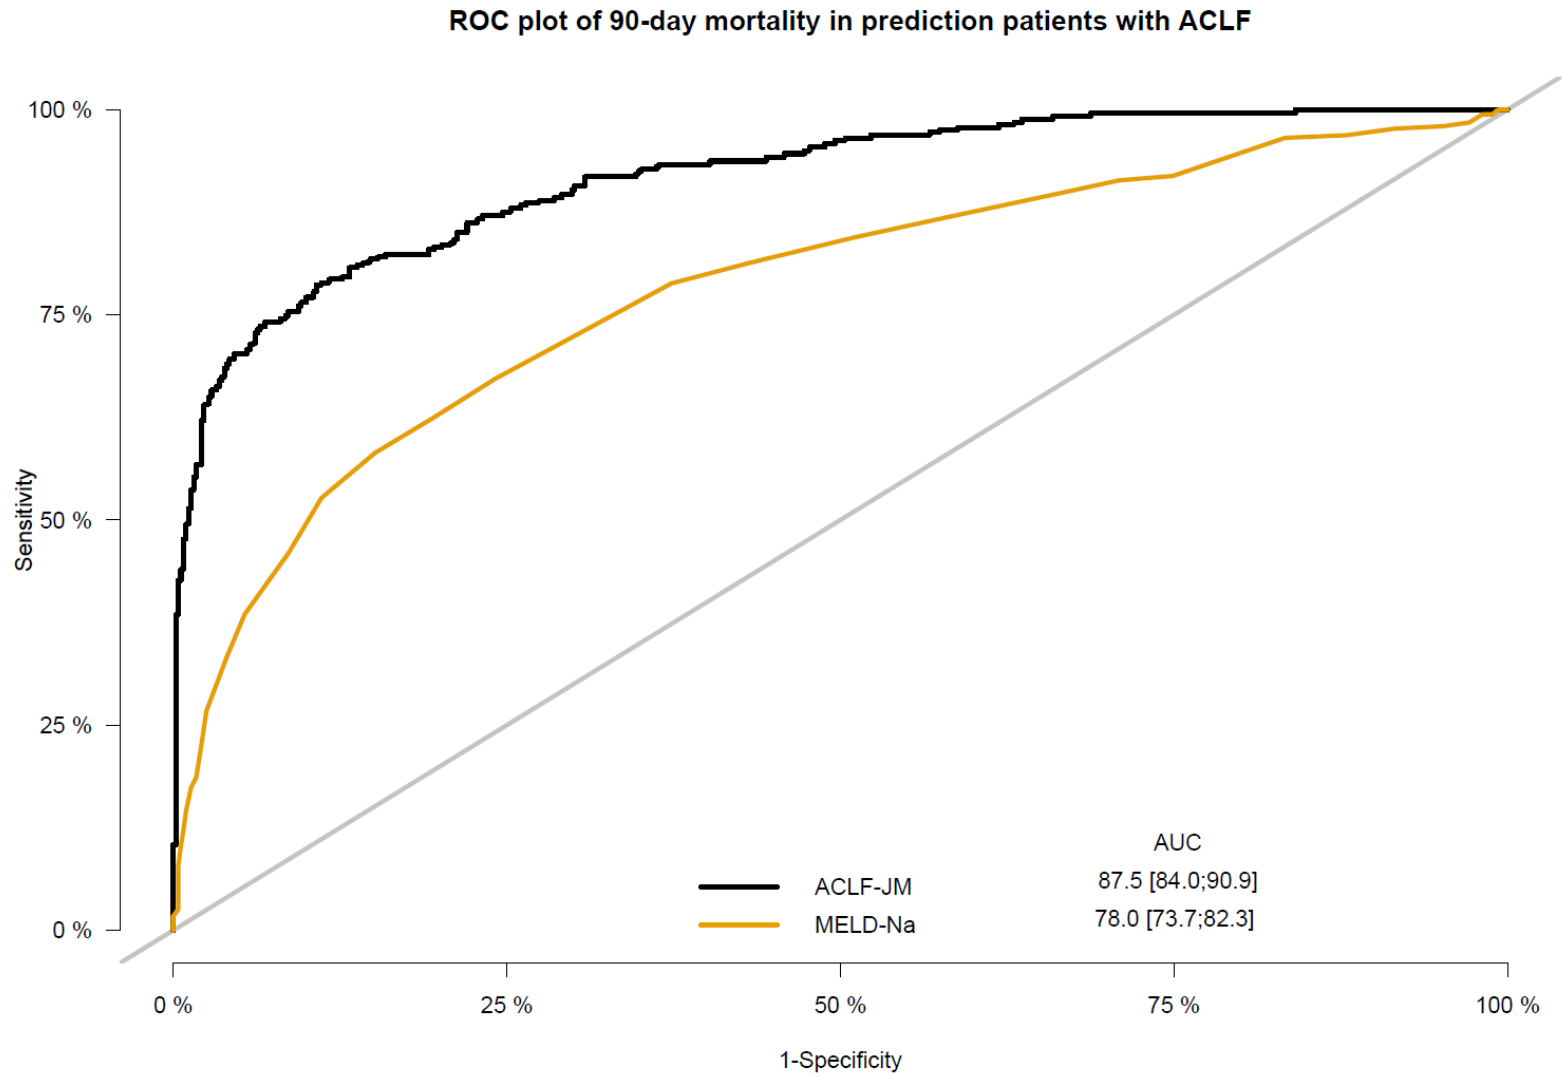

Fig. S2B: Calibration plot of the ACLF-JM and MELD-Na

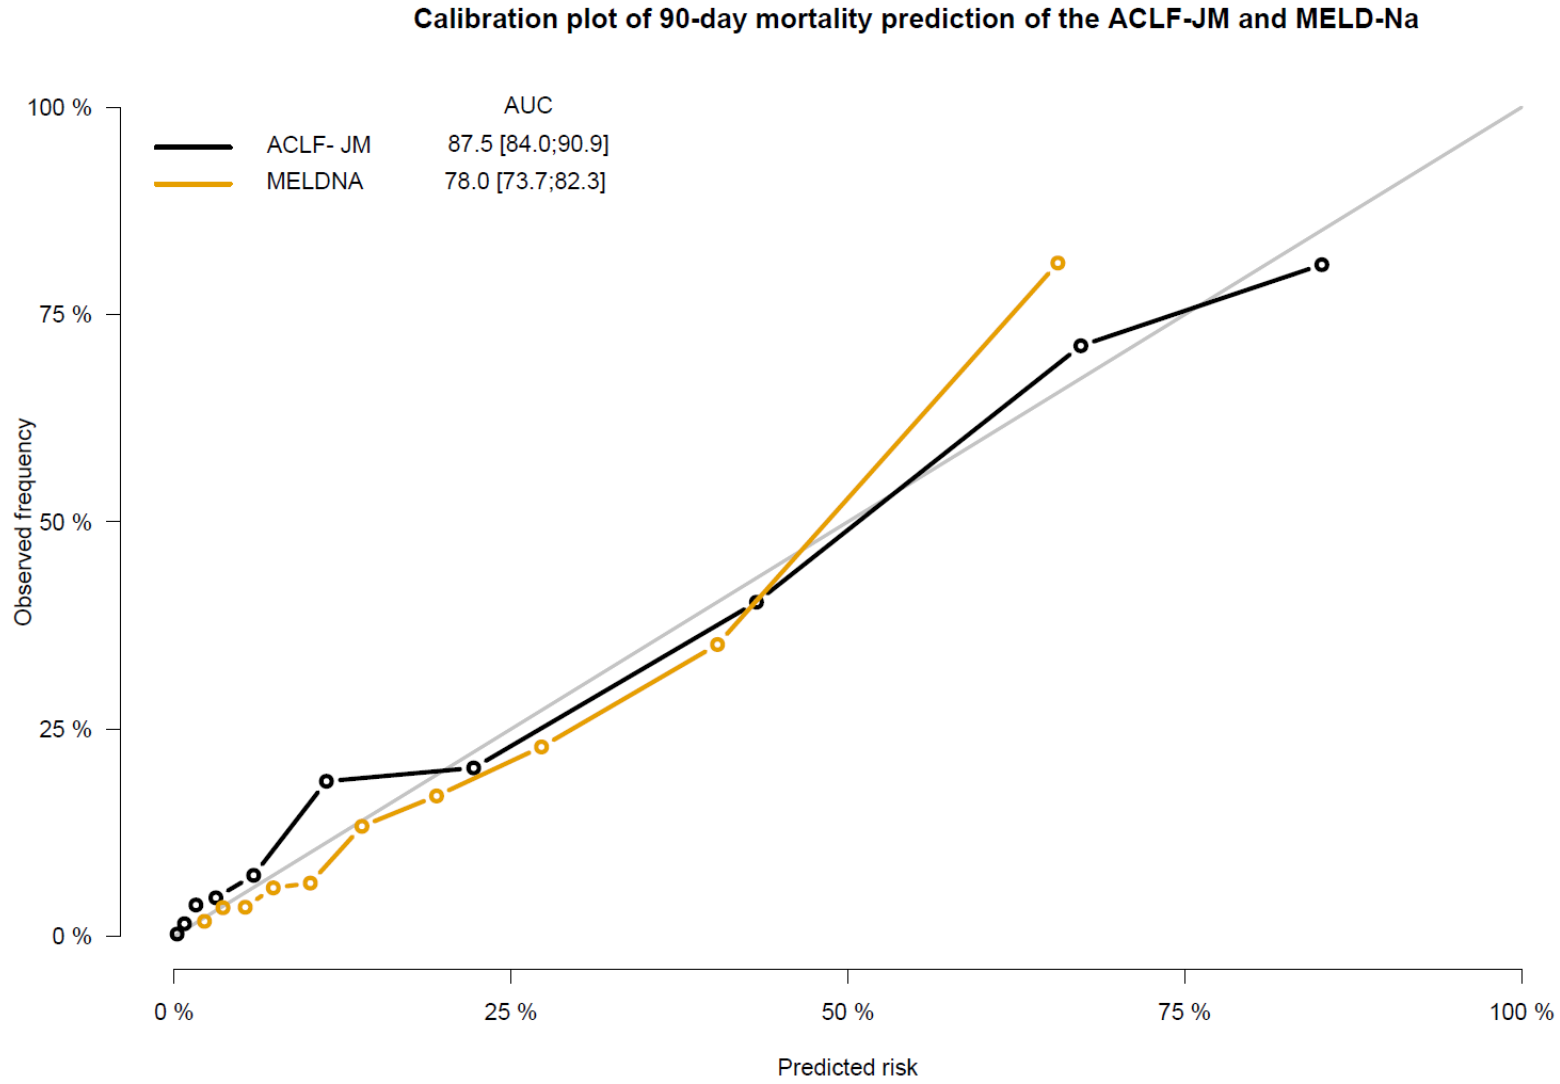

Fig. S3A: AUC improvement in percentages  
 Improvement in mortality prediction AUC of the ACLF-JM compared to MELD-Na

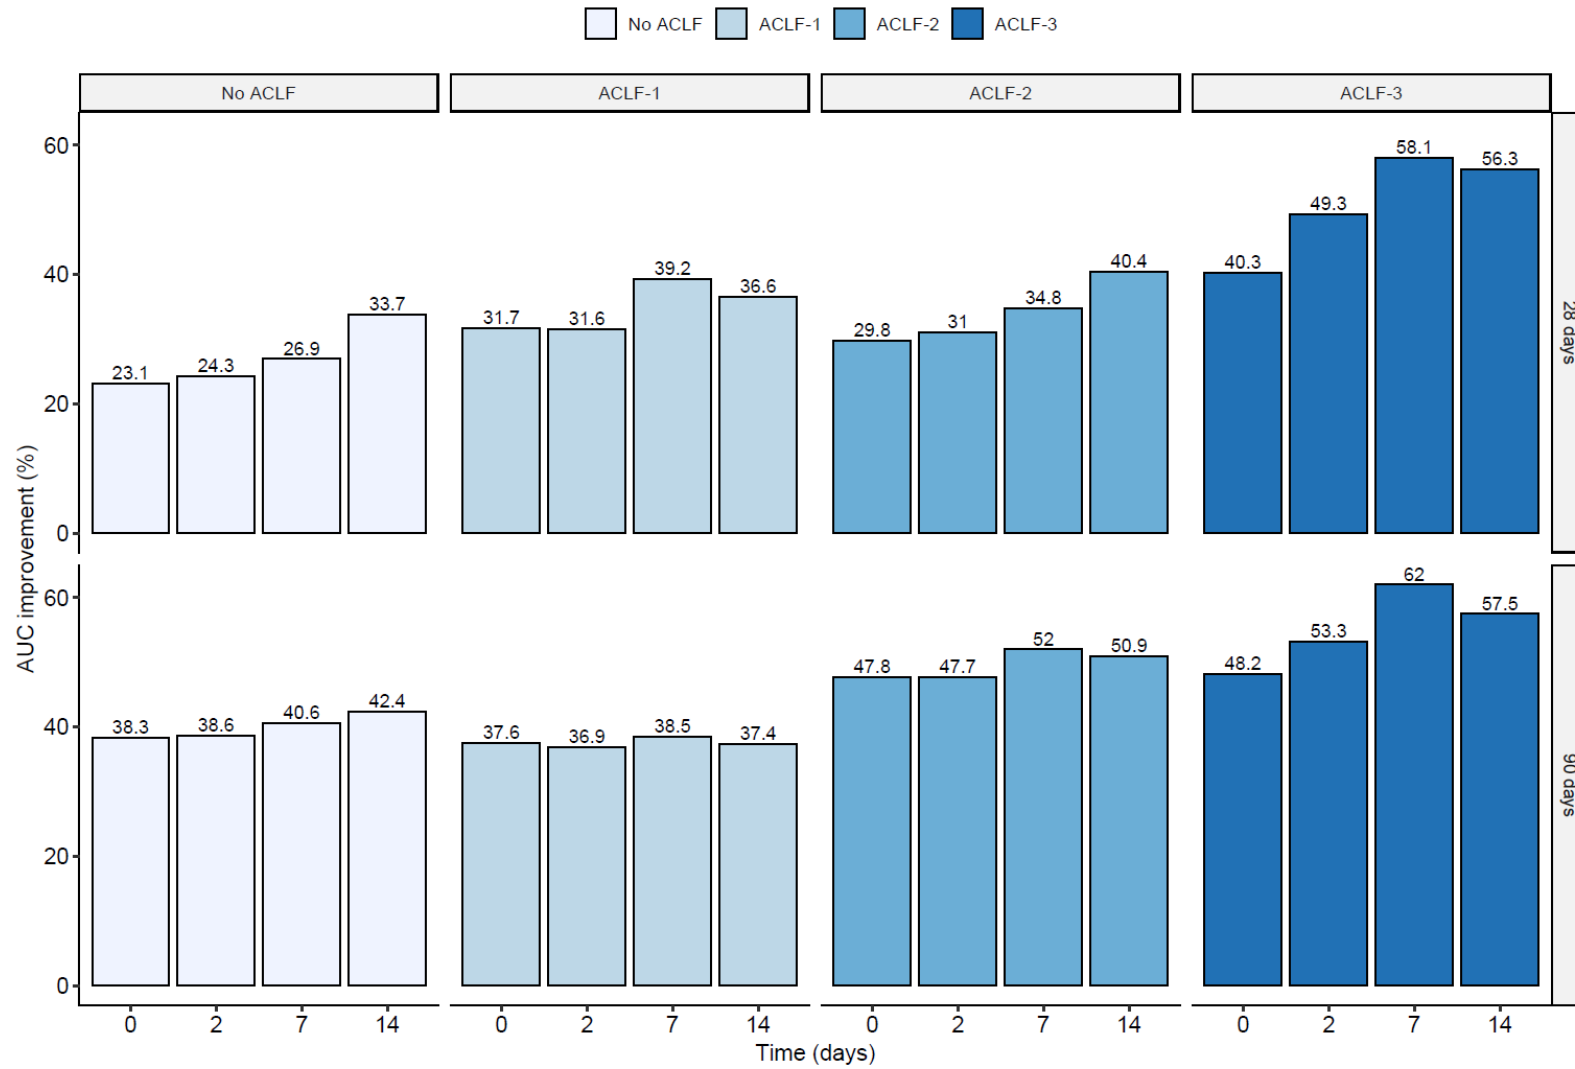

Fig. S3B: prediction errors improvements in percentages

Prediction error improvement of the ACLF-JM compared to MELD-Na

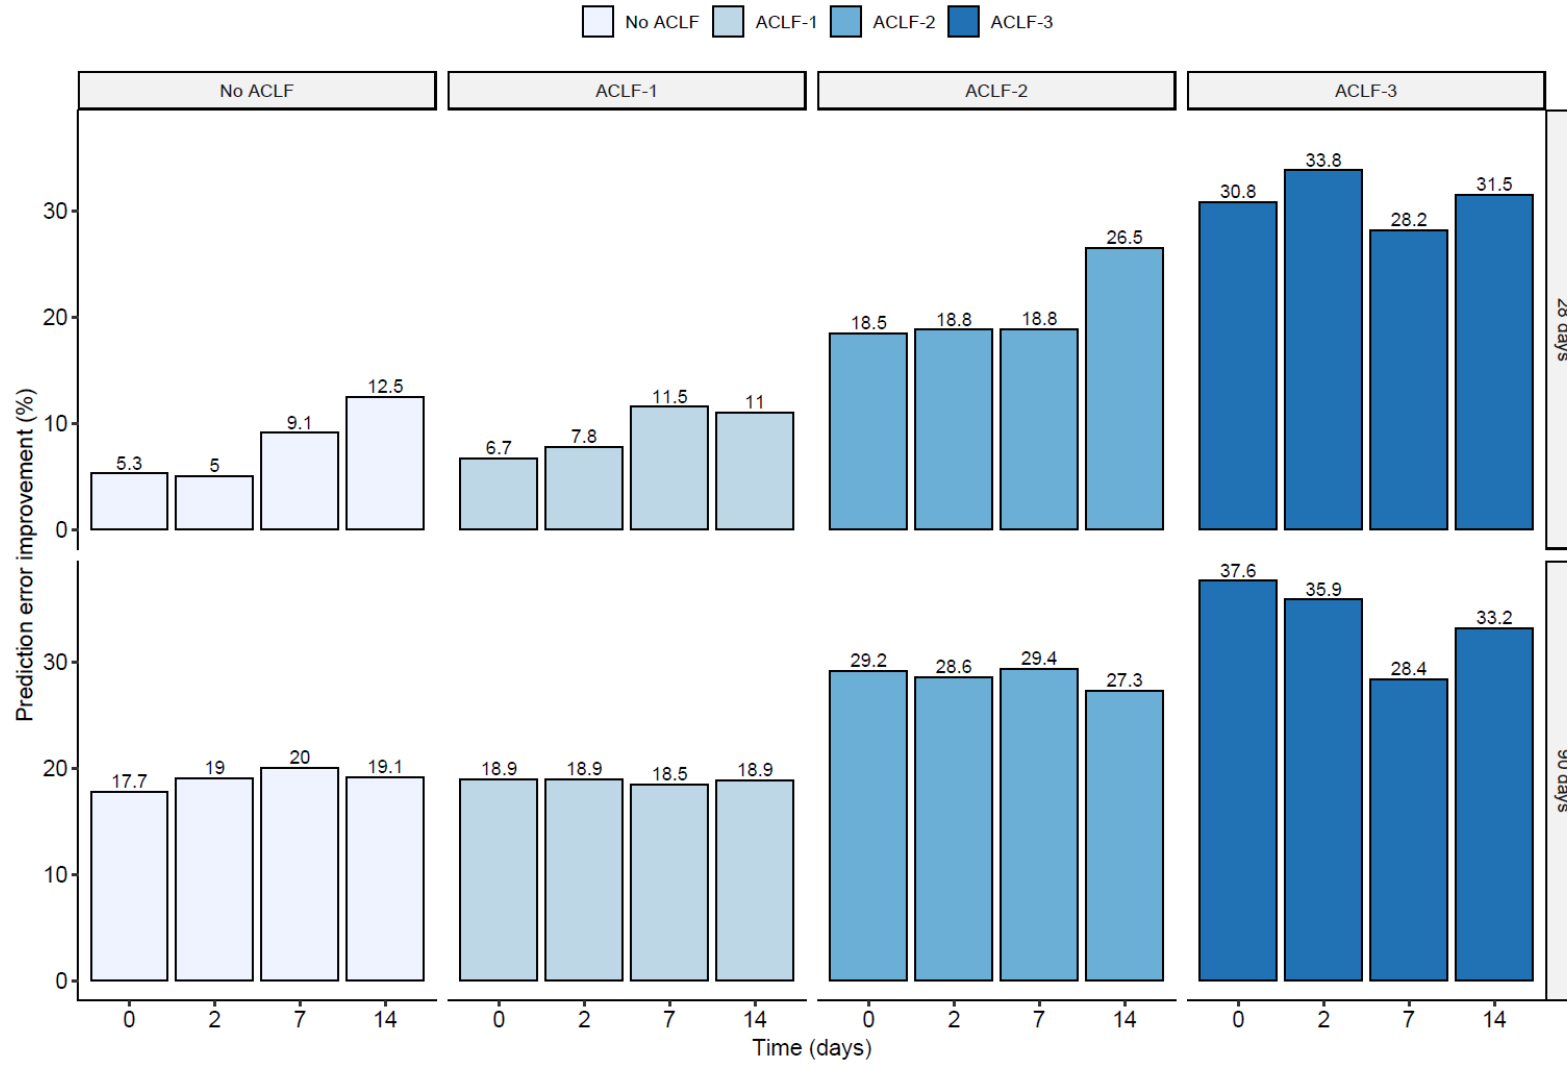



Fig. S4: illustration of model approximation of disease trajectory over time

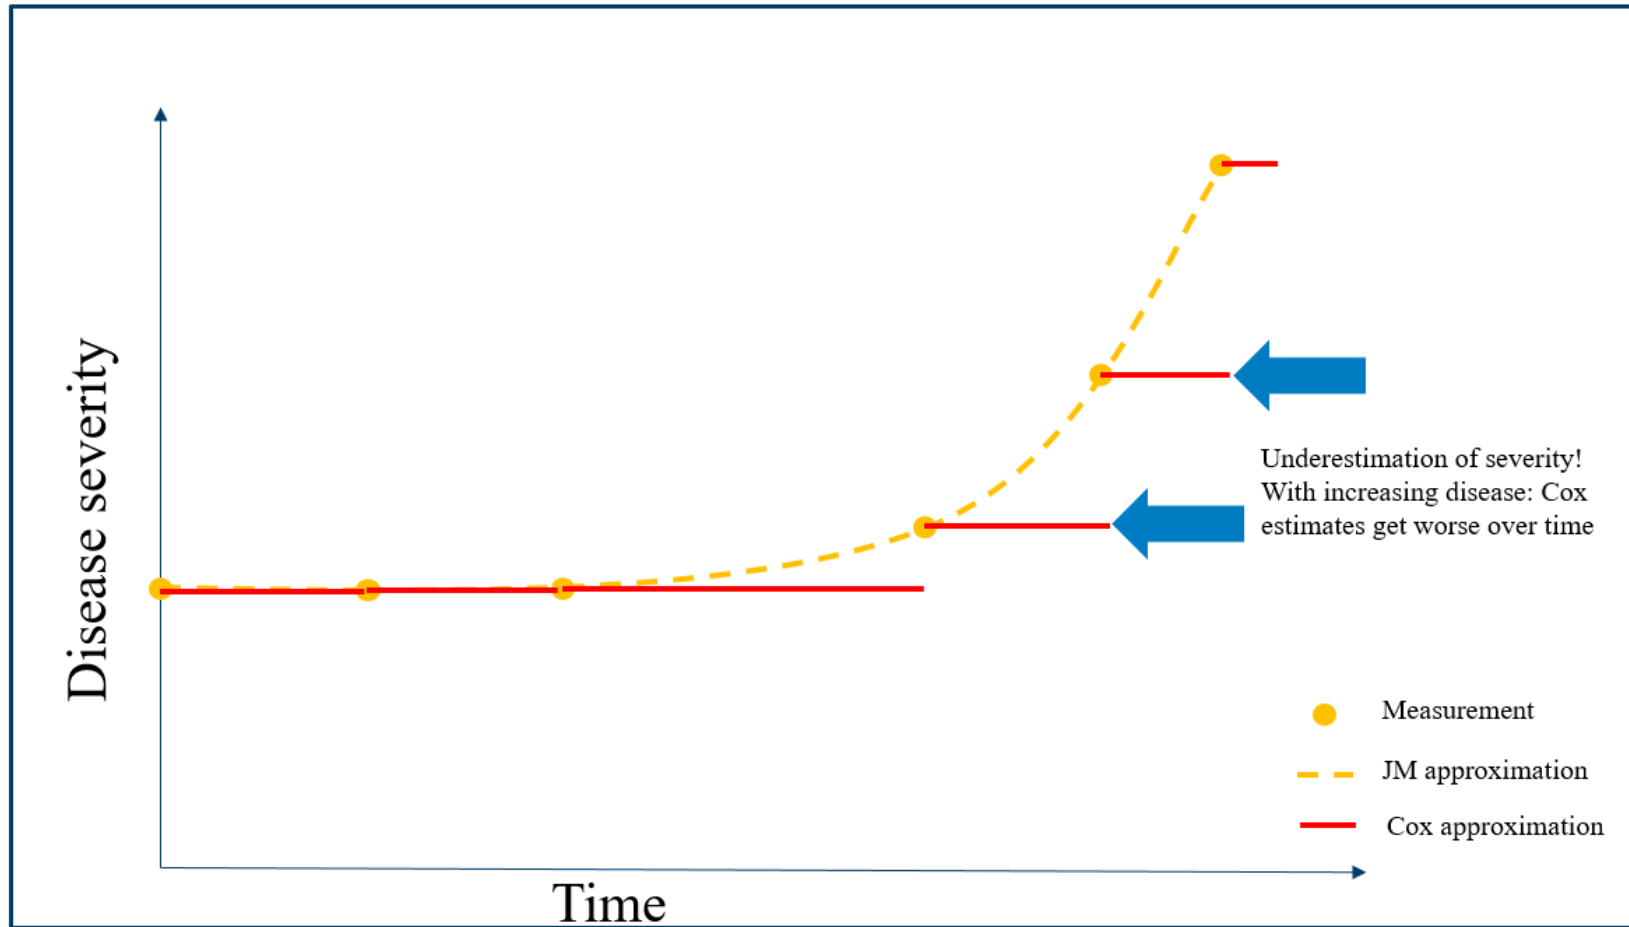

Fig. S5: Spline-based mixed effect plot of the average MELD-Na development over time

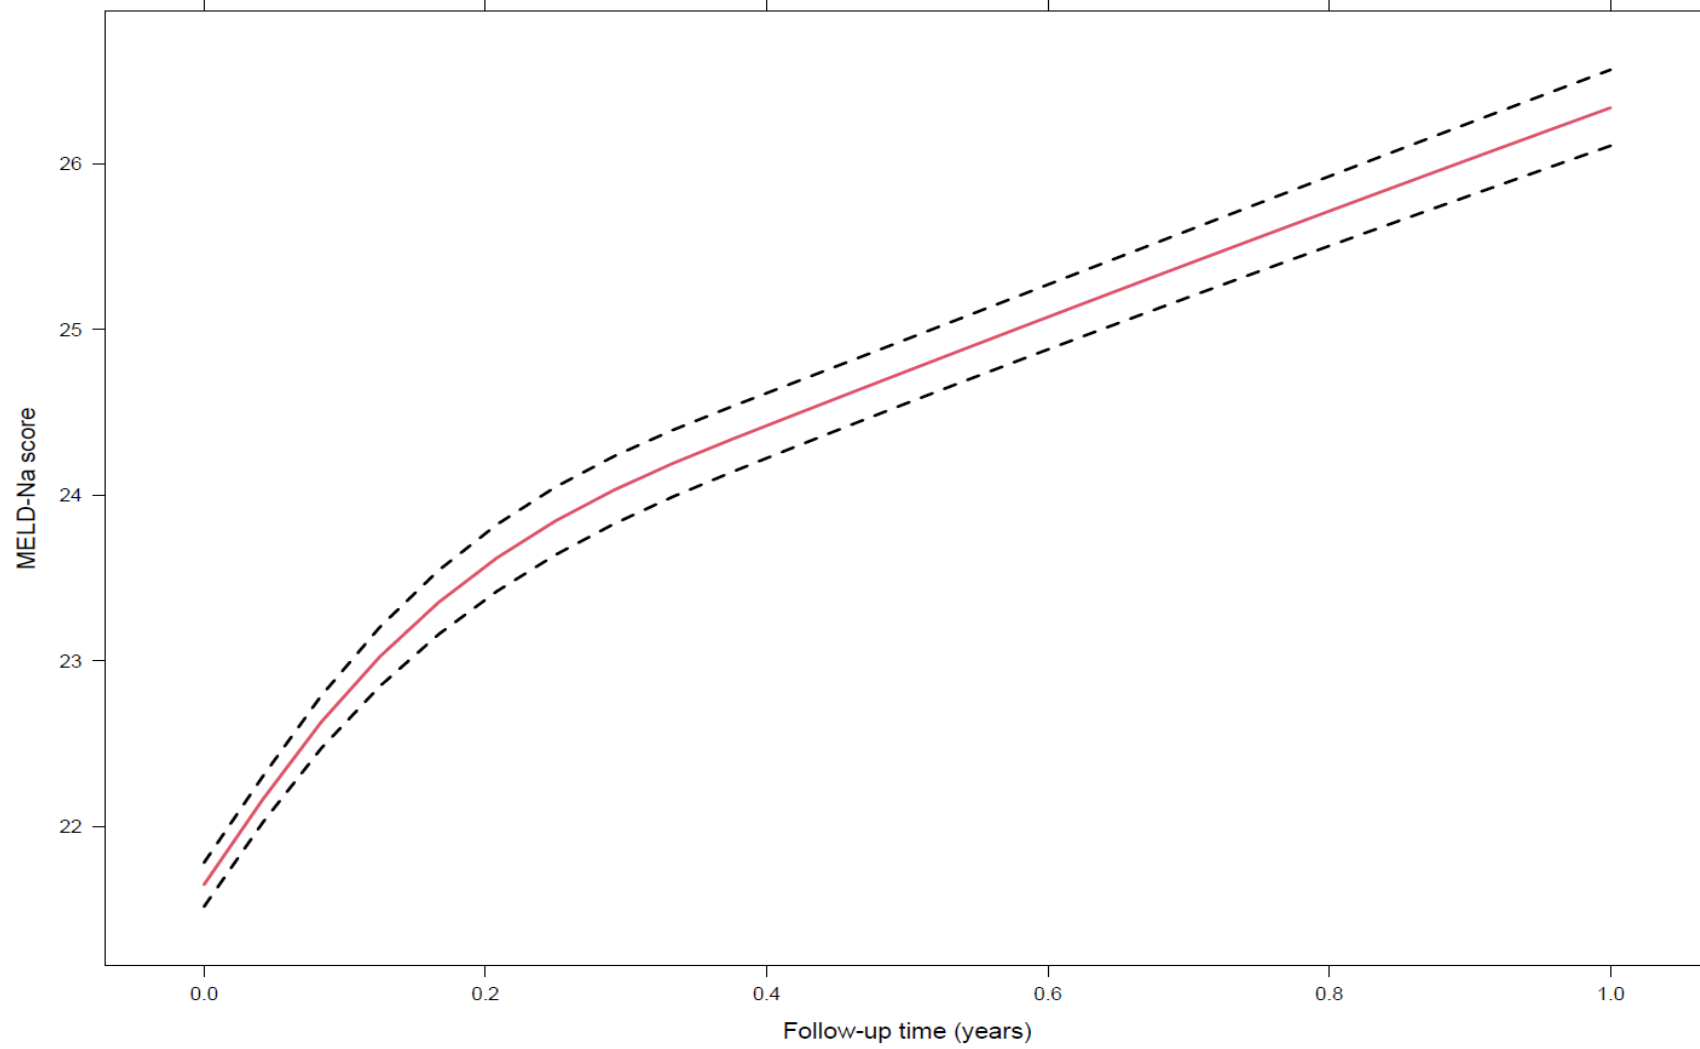

Fig. S6: ROC plot of the ACLF-JM and MELD-Na for delisted patients

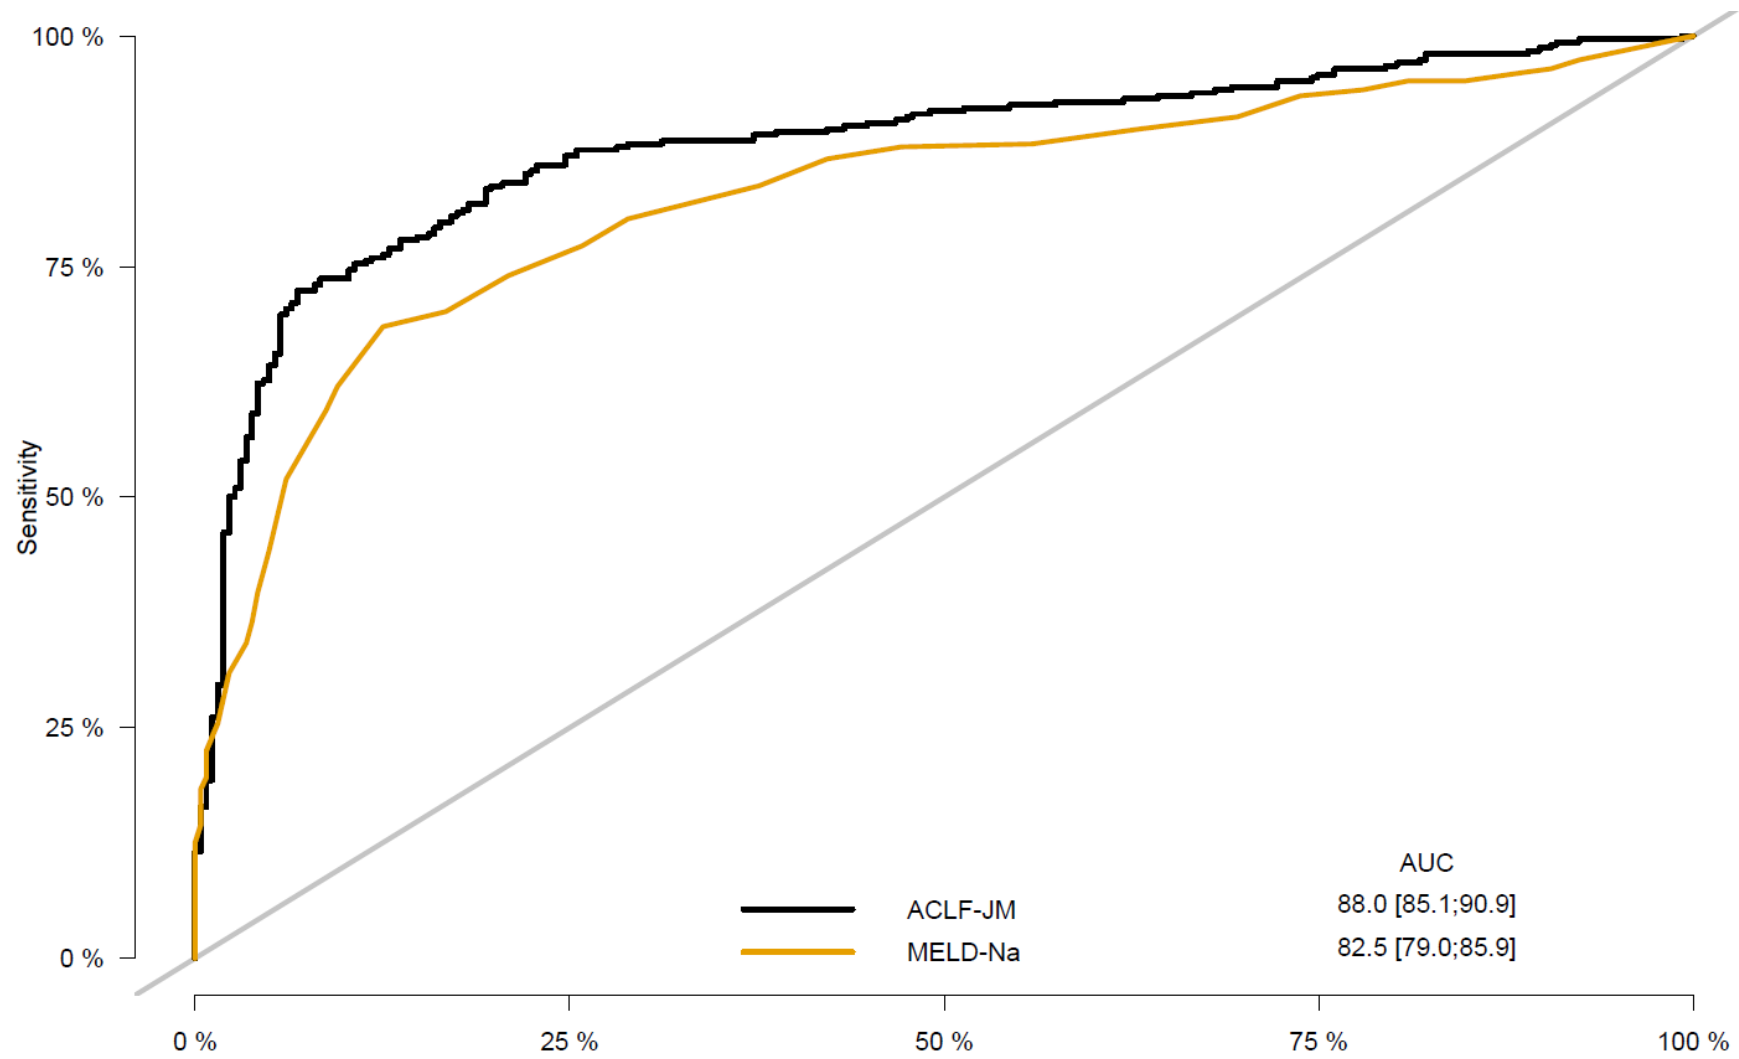

Table S1: mixed effect model output

| Spline mixed-effect model output  |       |           |        |         |         |
|-----------------------------------|-------|-----------|--------|---------|---------|
|                                   | Value | Std.Error | DF     | t-value | p-value |
| (Intercept)                       | 16.05 | 0.27      | 145979 | 60.46   | ***     |
| ns(years, df=3)1                  | 5.25  | 0.26      | 145979 | 20.24   | ***     |
| ns(years, df=3)2                  | 10.56 | 0.25      | 145979 | 42.95   | ***     |
| ns(years, df=3)3                  | 11.44 | 0.49      | 145979 | 23.47   | ***     |
| age10                             | -0.55 | 0.04      | 20448  | -12.57  | ***     |
| femalegender                      | 0.40  | 0.10      | 20448  | 4.20    | ***     |
| aclfACLF-1                        | 10.83 | 0.13      | 20448  | 85.33   | ***     |
| aclfACLF-2                        | 17.18 | 0.15      | 20448  | 111.05  | ***     |
| aclfACLF-3                        | 21.16 | 0.21      | 20448  | 98.93   | ***     |
| Cirrhosis (HCV, NASH, ALD, other) | 2.85  | 0.12      | 20448  | 24.50   | ***     |
| life_sup                          | -2.93 | 0.26      | 20448  | -11.22  | ***     |
| sbp                               | 2.14  | 0.15      | 20448  | 13.96   | ***     |

Table S2: List of candidate variables investigated for the joint model construction

|                              |                                                       |
|------------------------------|-------------------------------------------------------|
| CAN_ABO                      | Patient/s Blood Type                                  |
| CAN_AGE_AT_LISTING           | Calculated Candidate Age at Listing                   |
| CAN_AGE_IN_MONTHS_AT_LISTING | Calculated Candidate Age in Months at Listing         |
| CAN_ARTIFICIAL_LI            | Life Support://Artificial Liver                       |
| CAN_ASCITES                  | Ascites                                               |
| CAN_BACTERIA_PERIT           | Spontaneous Bacterial Peritonitis                     |
| CAN_BMI                      | BMI:                                                  |
| CAN_CTP_SCORE                | Candidate/s CTP score (used for MAOB Liver Variance   |
| CAN_DGN                      | Primary Diagnosis                                     |
| CAN_DGN2                     | Secondary Diagnosis                                   |
| CAN_DGN_OSTXT                | Primary Diagnosis/Specify                             |
| CAN_DIAB                     | Diabetes                                              |
| CAN_DIAB_TY                  | Diabetes                                              |
| CAN_DIAL                     | Dialysis                                              |
| CAN_ECMO                     | Life Support: ECMO                                    |
| CAN_ENCEPH                   | Encephalopathy                                        |
| CAN_ETHNICITY_SRTR           | SRTR Patient Ethnicity                                |
| CAN_FUNCNTN_STAT             | Patient/s Functional Status                           |
| CAN_GENDER                   | Patient/s Gender                                      |
| CAN_HGT_CM                   | Candidate/s Height (stored in cm)                     |
| CAN_IABP                     | Life Support: IABP                                    |
| CAN_INIT_SRTR_LAB_MELD       | First SRTR MELD/PELD given                            |
| CAN_IV_INOTROP               | Life Support: IV Inotropes                            |
| CAN_LAST_ALBUMIN             | Candidate Last Albumin (used for MELD)                |
| CAN_LAST_ASCITES             | Candidate Last Ascites (used for MELD)                |
| CAN_LAST_BILI                | Candidate Last Bilirubin (used for MELD)              |
| CAN_LAST_DIAL_PRIOR_WEEK     | Last non-blank val. of dialysis within prior week     |
| CAN_LAST_ENCEPH              | Candidate Last Encephalopathy (used for MELD)         |
| CAN_LAST_INR                 | Candidate Last INR (used for MELD)                    |
| CAN_LAST_SERUM_CREAT         | Candidate Last Serum Creatinine mg/dl (used for MELD) |
| CAN_LAST_SERUM_SODIUM        | Candidate Last Serum Sodium (used for MELD)           |

|                        |                                                       |
|------------------------|-------------------------------------------------------|
| CAN_LAST_SRTR_LAB_MELD | Last SRTR MELD/PELD given                             |
| CAN_LIFE_SUPPORT       | Patient on Life Support                               |
| CAN_LIFE_SUPPORT_OTHER | Life Support: Other Mechanism                         |
| CAN_MALIG              | Any previous Malignancy                               |
| CAN_MALIG_TY           | Previous Malignancy Type(s)                           |
| CAN_MOST_RECENT_CREAT  | Most Recent Absolute Creatinine                       |
| CAN_MOST_RECENT_HGT_CM | Candidate/s most recent Waitlist Height in centimeter |
| CAN_MOST_RECENT_WGT_KG | Candidate/s most recent Waitlist Weight in kilograms  |
| CAN_MUSCLE_WASTING     | Marked Muscle Wasting                                 |
| CAN_NEOPLASM           | Neoplasm                                              |
| CAN_PREV_ABDOM_SURG    | Previous Upper Abdominal Surgery                      |
| CAN_PREV_TX            | Previous Transplants                                  |
| CAN_RACE               | Patient/s Race                                        |
| CAN_TIPSS              | History of TIPSS                                      |
| CAN_TOT_ALBUMIN        | Total Serum Albumin                                   |
| CAN_TOT_BILI           | Total Bilirubin (IN Pediatric Only)                   |
| CAN_VARICEAL_BLEEDING  | Variceal Bleeding within Last Two Weeks               |
| CAN_VENTILATOR         | Life Support: Ventilator                              |
| CAN_WGT_KG             | Candidate/s Weight in kilograms                       |

Table S3: AUCs stratified per ACLF grade

| Mortality prediction AUC of the ACLF-JM versus the MELD-Na in patients with ACLF, at baseline and during follow-up |        |             |         |             |        |             |         |             |        |             |         |             |
|--------------------------------------------------------------------------------------------------------------------|--------|-------------|---------|-------------|--------|-------------|---------|-------------|--------|-------------|---------|-------------|
| 28-day mortality                                                                                                   | ACLF-1 |             |         |             | ACLF-2 |             |         |             | ACLF-3 |             |         |             |
|                                                                                                                    | JM     | 95% CI      | MELD-Na | 95% CI      | JM     | 95% CI      | MELD-Na | 95% CI      | JM     | 95% CI      | MELD-Na | 95% CI      |
| Baseline                                                                                                           | 0.817  | 0.771-0.862 | 0.732   | 0.681-0.783 | 0.809  | 0.749-0.870 | 0.728   | 0.664-0.792 | 0.764  | 0.665-0.863 | 0.605   | 0.496-0.714 |
| 48 hours                                                                                                           | 0.816  | 0.770-0.862 | 0.731   | 0.680-0.782 | 0.813  | 0.750-0.875 | 0.729   | 0.663-0.796 | 0.779  | 0.672-0.887 | 0.564   | 0.442-0.685 |
| 7 days                                                                                                             | 0.825  | 0.778-0.872 | 0.712   | 0.656-0.768 | 0.807  | 0.739-0.874 | 0.704   | 0.629-0.778 | 0.792  | 0.663-0.921 | 0.504   | 0.363-0.645 |
| 14 days                                                                                                            | 0.818  | 0.763-0.872 | 0.713   | 0.648-0.779 | 0.820  | 0.738-0.903 | 0.698   | 0.608-0.788 | 0.780  | 0.626-0.935 | 0.497   | 0.334-0.659 |
| 90-day mortality                                                                                                   | ACLF-1 |             |         |             | ACLF-2 |             |         |             | ACLF-3 |             |         |             |
|                                                                                                                    | JM     | 95% CI      | MELD-Na | 95% CI      | JM     | 95% CI      | MELD-Na | 95% CI      | JM     | 95% CI      | MELD-Na | 95% CI      |
| Baseline                                                                                                           | 0.829  | 0.791-0.868 | 0.726   | 0.679-0.773 | 0.859  | 0.802-0.916 | 0.730   | 0.651-0.808 | 0.841  | 0.634-0.949 | 0.693   | 0.453-0.933 |
| 48 hours                                                                                                           | 0.824  | 0.786-0.863 | 0.721   | 0.674-0.769 | 0.862  | 0.804-0.920 | 0.736   | 0.656-0.815 | 0.843  | 0.636-0.950 | 0.664   | 0.424-0.905 |
| 7 days                                                                                                             | 0.824  | 0.784-0.864 | 0.714   | 0.666-0.763 | 0.856  | 0.796-0.917 | 0.700   | 0.614-0.786 | 0.853  | 0.643-0.963 | 0.613   | 0.408-0.818 |
| 14 days                                                                                                            | 0.809  | 0.764-0.854 | 0.695   | 0.642-0.748 | 0.836  | 0.766-0.907 | 0.666   | 0.567-0.766 | 0.844  | 0.613-0.976 | 0.633   | 0.423-0.844 |

ACLF: acute-on-chronic liver failure, AUC: area under receiver operator curve

JM: joint model, MELD-Na: model for end-stage liver disease sodium score

Table S4: Advantages and disadvantages of the MELD-Na and ACLF-JM

**Cox MELD-Na****Pros**

Easy to interpret

Calculated quickly

**Cons**

Uses one moment/measurement in time to assess disease severity

Ignores previous measurements

Assumes linear disease development

Predicts survival based on population averages

**Joint model****Pros**

Adequately handles complex follow-up data (missing, irregularly measured)

Considers different correlation of measurements within or between patients

Assesses both development over time and time-to-event data

Uses all available measurements

Updates predictions for every new measurement, i.e. accumulating evidence

Can model both linear and non-linear disease development

Predicts both on population and individual patient level

Can simulate individual patient data to calculate personalized predictions

**Cons**

Takes longer to compute

Statistically complex



[end of manuscript: this page is left empty]
