# Supplementary material for: Development and validation of a dynamic survival prediction model for patients with acute-on-chronic liver failure
Source: PubMed Central journal article supplement (PMC8570961; doi:10.1016/j.jhepr.2021.100369), 2021-09-29
Supplement: mmc2.pdf [file mmc2.pdf]

## Journal of Hepatology

### CTAT methods

Tables for a “Complete, Transparent, Accurate and Timely account” (CTAT) are now mandatory for all revised submissions. The aim is to enhance the reproducibility of methods.

- Only include the parts relevant to your study
- Refer to the CTAT in the main text as ‘Supplementary CTAT Table’
- Do not add subheadings
- Add as many rows as needed to include all information
- Only include one item per row

**If the CTAT form is not relevant to your study, please outline the reasons why:**

|                                                                                  |
|----------------------------------------------------------------------------------|
| This study is observational in nature and the data was obtained retrospectively. |
|----------------------------------------------------------------------------------|

#### 1.1 Antibodies

| Name | Citation | Supplier | Cat no. | Clone no. |
|------|----------|----------|---------|-----------|
| N/A  | N/A      | N/A      | N/A     | N/A       |

#### 1.2 Cell lines

| Name | Citation | Supplier | Cat no. | Passage no. | Authentication test method |
|------|----------|----------|---------|-------------|----------------------------|
| N/A  | N/A      | N/A      | N/A     | N/A         | N/A                        |

#### 1.3 Organisms

| Name | Citation | Supplier | Strain | Sex | Age | Overall n number |
|------|----------|----------|--------|-----|-----|------------------|
| N/A  | N/A      | N/A      | N/A    | N/A | N/A | N/A              |

#### 1.4 Sequence based reagents

| Name | Sequence | Supplier |
|------|----------|----------|
| N/A  | N/A      | N/A      |

#### 1.5 Biological samples

| Description | Source | Identifier |
|-------------|--------|------------|
| N/A         | N/A    | N/A        |

#### 1.6 Deposited data

| Name of repository | Identifier | Link |
|--------------------|------------|------|
| N/A                | N/A        | N/A  |

## 1.7 Software

| Software name | Manufacturer | Version |
|---------------|--------------|---------|
| N/A           | N/A          | N/A     |

## 1.8 Other (e.g. drugs, proteins, vectors etc.)

|     |     |     |
|-----|-----|-----|
| N/A | N/A | N/A |
| N/A | N/A | N/A |

## 1.9 Please provide the details of the corresponding methods author for the manuscript:

**B.F.J. Goudsmit, MD**  
Division of Transplantation, Department of Surgery, Leiden University Medical Centre  
Address: Albinusdreef 2, 2333 ZA Leiden, The Netherlands.  
e-mail: [b.f.j.goudsmit@lumc.nl](mailto:b.f.j.goudsmit@lumc.nl)

## 2.0 Please confirm for randomised controlled trials all versions of the clinical protocol are included in the submission. These will be published online as supplementary information.

N/A
